# Supplementary material for: Mindfulness Interventions for Attention Deficit Hyperactivity Disorder: A Systematic Review and Meta-Analysis
Source: MDPI journal article supplement (doi:10.3390/psychiatryint3040031), 2022-12-07
Supplement: s1 [file s1]

Archive with 7 entries (7 files):
- psychiatryint-1959904-Supplementary Figure S1.tif
- psychiatryint-1959904-Supplementary Figure S2.tif
- psychiatryint-1959904-Supplementary Table S1.pdf
- psychiatryint-1959904-Supplementary Table S2.pdf
- psychiatryint-1959904-Supplementary Table S3.pdf
- psychiatryint-1959904-Supplementary Table S4.pdf
- psychiatryint-1959904-Suppplementary Table S5.pdf
