# Supplementary material for: Mindfulness Interventions for Attention Deficit Hyperactivity Disorder: A Systematic Review and Meta-Analysis
Source: MDPI journal article supplement (doi:10.3390/psychiatryint3040031), 2022-12-07
Supplement: s1 [file s1 › psychiatryint-1959904-Supplementary Table S1.pdf]

**Table S1.** Quality assessment of pre-post designs.

| Quality Criteria                                                                                                                                                                       |          |          |          | Bueno et al., 2015 [86] | Haydicky et al., 2015 [90] | Sibalis et al., 2019 [77] | Van de Weijer-Bergsma et al., 2012 [103] | Zhang et al., 2017 [105] | Zylowska et al., 2008 [78] |
|----------------------------------------------------------------------------------------------------------------------------------------------------------------------------------------|----------|----------|----------|-------------------------|----------------------------|---------------------------|------------------------------------------|--------------------------|----------------------------|
| Was the study question or objective clearly stated?                                                                                                                                    |          |          |          | Y                       | Y                          | Y                         | Y                                        | Y                        | Y                          |
| Were eligibility or selection criteria for the study population pre-specified and clearly described?                                                                                   |          |          |          | Y                       | Y                          | N                         | N                                        | Y                        | Y                          |
| Were participants representative of those who would be eligible for the intervention in the general or clinical population of interest?                                                |          |          |          | Y                       | Y                          | Y                         | Y                                        | Y                        | Y                          |
| Were all eligible participants that met the pre-specified entry criteria enrolled?                                                                                                     |          |          |          | Y                       | NR                         | NA                        | NA                                       | NR                       | N                          |
| Was the sample size sufficiently large to provide confidence in the findings?                                                                                                          |          |          |          | N                       | N                          | N                         | N                                        | N                        | N                          |
| Was the intervention clearly described and delivered consistently across the study population?                                                                                         |          |          |          | N                       | Y                          | N                         | Y                                        | N                        | N                          |
| Were the outcome measures prespecified, clearly defined, valid, reliable, and assessed consistently across all study participants?                                                     |          |          |          | Y                       | Y                          | Y                         | Y                                        | Y                        | Y                          |
| Were the people assessing outcomes blinded to the participants' interventions?                                                                                                         |          |          |          | Y**                     | N                          | NR                        | N                                        | N                        | N                          |
| Was the loss to follow-up after baseline 20% or less? Were those lost to follow-up accounted for in the analysis?                                                                      |          |          |          | Y, N                    | Y, N                       | NR, NR                    | Y, N                                     | Y, N                     | N, N                       |
| Did the statistical methods examine changes in outcome measures from before to after the intervention? Were statistical tests done that provided p values for the pre-to-post changes? |          |          |          | Y, Y                    | Y, Y                       | Y, Y                      | Y, Y                                     | Y, Y                     | Y, Y                       |
| Were outcome measures of interest taken multiple times before the intervention and multiple times after the intervention?                                                              |          |          |          | N                       | Y                          | N                         | N                                        | N                        | N                          |
| If the intervention was conducted at a group level did the statistical analysis consider the use of individual-level data to determine effects at the group level?                     |          |          |          | Y                       | Y                          | Y                         | Y                                        | Y                        | Y                          |
| Evaluation                                                                                                                                                                             | G = Good | F = Fair | P = Poor | G                       | G                          | P                         | F                                        | F                        | P                          |

Pre-Post Design Studies evaluated with the NHLBI Study Quality Assessment Tool (Y = Yes, N = No, NR = Not reported, NA = Not applicable). In all cases where NR it was not possible to determine from the reported information. \*\* indicates that some blind measures were collected but these were accompanied by self-report
