# Supplementary material for: Mindfulness Interventions for Attention Deficit Hyperactivity Disorder: A Systematic Review and Meta-Analysis
Source: MDPI journal article supplement (doi:10.3390/psychiatryint3040031), 2022-12-07
Supplement: s1 [file s1 › psychiatryint-1959904-Supplementary Table S2.pdf]

**Table S2.** Quality assessment of non-randomized designs.

| Quality Criteria                                                                                                                                                 | Converse<br>et al.<br>2020 [79] | Edel et<br>al. 2017<br>[87] | Haydicky<br>et al. 2012<br>[89] | Rynczak,<br>2013<br>[101] | Van der<br>Oord et al.,<br>2012 [104] |
|------------------------------------------------------------------------------------------------------------------------------------------------------------------|---------------------------------|-----------------------------|---------------------------------|---------------------------|---------------------------------------|
| Was the study described as randomized, randomized trial, a randomized clinical trial, or an RCT?                                                                 | Y*                              | N                           | N                               | N                         | N                                     |
| Was the method of randomization adequate?                                                                                                                        | N                               | NA                          | NA                              | NA                        | NA                                    |
| Was the treatment allocation concealed?                                                                                                                          | NR                              | NA                          | NA                              | NA                        | NA                                    |
| Were study participants and providers blinded to treatment group assignment?                                                                                     | N                               | N                           | N                               | N                         | N                                     |
| Were the people assessing the outcomes blinded to the participants' group assignments?                                                                           | Y**                             | N                           | Y**                             | N                         | N                                     |
| Were the groups similar at baseline on important characteristics that could affect outcomes?                                                                     | NR                              | N                           | Y                               | NR                        | N                                     |
| Was the overall drop-out rate from the study at endpoint 20% or lower of the number allocated to treatment?                                                      | Y                               | Y                           | NR                              | Y                         | Y                                     |
| Was the differential drop-out rate at endpoint 15 % points or lower?                                                                                             | Y                               | Y                           | NA                              | NR                        | NA                                    |
| Was there high adherence to the intervention protocols for each treatment group?                                                                                 | N                               | Y                           | Y                               | Y                         | Y                                     |
| Were other interventions avoided or similar in the groups? <sup>a</sup>                                                                                          | NR, NR                          | Y, NR                       | NR, NR                          | NR, Y                     | NR, Y                                 |
| Were outcomes assessed using valid and reliable measures, implemented consistently across all study participants?                                                | Y                               | N                           | Y                               | Y                         | Y                                     |
| Did the authors report that the sample size was sufficiently large to be able to detect a difference in the main outcome between groups with at least 80% power? | N                               | N                           | N                               | N                         | N                                     |
| Were outcomes reported or subgroups analysed pre-specified?                                                                                                      | Y                               | Y                           | Y                               | Y                         | Y                                     |
| Were all randomized participants analysed in the group to which they were originally assigned, i.e., did they use an intention-to-treat analysis?                | N                               | Y                           | NR                              | Y                         | Y                                     |
| Evaluation    G = Good    F = Fair    P = Poor                                                                                                                   | P                               | F                           | F                               | F                         | F                                     |

Non-Randomized Controlled Trial Controlled Intervention Studies evaluated with the NHLBI Study Quality Assessment Tool (Y = Yes, N = No, NR = Not reported, NA = Not applicable). In all cases where NR it was not possible to determine from the reported information. <sup>a</sup> Data is separated out for medication and non-medication treatments with medication details given first. \* indicates that study was a feasibility trial for an RCT rather than full RCT. \*\*indicates some self-report measures were also included which were not blind.
