# Supplementary material for: Mindfulness Interventions for Attention Deficit Hyperactivity Disorder: A Systematic Review and Meta-Analysis
Source: MDPI journal article supplement (doi:10.3390/psychiatryint3040031), 2022-12-07
Supplement: s1 [file s1 › psychiatryint-1959904-Supplementary Table S3.pdf]

**Table S3.** Quality assessment of randomized designs.

| Quality Criteria                                                                                                                                                 | Bachmann<br>et al., 2018<br>[84] | Behbahani<br>et al., 2018<br>[85] | Gershby et<br>al.<br>2017 [80] | Gu et<br>al., 2018<br>[88] | Hepark<br>et al.,<br>2019 [91] | Hoxhaj et<br>al. 2018<br>[92] | Huguet<br>et al. 2018<br>[93] | Janssen<br>et al. 2019<br>[94] | Kiani et<br>al.<br>2017 [95] |
|------------------------------------------------------------------------------------------------------------------------------------------------------------------|----------------------------------|-----------------------------------|--------------------------------|----------------------------|--------------------------------|-------------------------------|-------------------------------|--------------------------------|------------------------------|
| Was the study described as randomized, randomized trial, a randomized clinical trial, or an RCT?                                                                 | Y                                | Y                                 | Y                              | Y                          | Y                              | Y                             | Y                             | Y                              | Y                            |
| Was the method of randomization adequate?                                                                                                                        | Y                                | Y                                 | Y                              | NR                         | NR                             | Y                             | NR                            | Y                              | NR                           |
| Was the treatment allocation concealed?                                                                                                                          | Y                                | NR                                | Y                              | Y                          | Y                              | Y                             | NR                            | Y                              | NR                           |
| Were study participants and providers blinded to treatment group assignment?                                                                                     | N                                | N                                 | N                              | N                          | N                              | N                             | N                             | N                              | N                            |
| Were the people assessing the outcomes blinded to the participants' group assignments?                                                                           | NR                               | N                                 | N                              | Y**                        | Y**                            | Y**                           | NR                            | Y**                            | NR                           |
| Were the groups similar at baseline on important characteristics that could affect outcomes?                                                                     | Y                                | Y                                 | Y                              | Y                          | NR                             | Y                             | Y                             | Y                              | Y                            |
| Was the overall drop-out rate from the study at endpoint 20% or lower of the number allocated to treatment?                                                      | Y                                | Y                                 | N                              | Y                          | N                              | N                             | Y                             | Y                              | Y                            |
| Was the differential drop-out rate at endpoint $\leq 15\%$ points?                                                                                               | Y                                | Y                                 | N                              | Y                          | Y                              | Y                             | Y                             | Y                              | Y                            |
| Was there high adherence to the intervention protocols for each treatment group?                                                                                 | Y                                | Y                                 | N                              | Y                          | N                              | Y                             | Y                             | Y                              | NR                           |
| Were other interventions avoided or similar in the groups? <sup>a</sup>                                                                                          | Y, Y                             | NR, NR                            | NR, NR                         | Y, NR                      | Y, Y                           | Y, Y                          | Y, Y                          | N, Y                           | Y, Y                         |
| Were outcomes assessed using valid and reliable measures, implement-ted consistently across all study participants?                                              | Y                                | Y                                 | Y                              | Y                          | Y                              | Y                             | Y                             | Y                              | Y                            |
| Did the authors report that the sample size was sufficiently large to be able to detect a difference in the main outcome between groups with at least 80% power? | N                                | N                                 | N                              | N                          | Y                              | N                             | N                             | Y                              | N                            |
| Were outcomes reported or subgroups analysed prespecified?                                                                                                       | Y                                | Y                                 | Y                              | Y                          | Y                              | Y                             | Y                             | Y                              | Y                            |
| Were all randomized participants analysed in the group to which they were originally assigned, i.e., did they use an intention-to-treat analysis?                | N                                | NR                                | NR                             | Y                          | Y                              | N                             | NR                            | Y                              | Y                            |
| Evaluation    G = Good    F = Fair    P = Poor                                                                                                                   | G                                | F                                 | P                              | G                          | G                              | G                             | F                             | G                              | F                            |

| Quality Criteria                                                                                                                                                 | Kratter<br>1983 [81] | Liu et al.,<br>2021 [96] | Lo et al.,<br>2020 [97] | Meyer et<br>al., 2021<br>[98] | Mitchell<br>et al.,<br>2017 [99] | Muratori<br>et al.,<br>2021 [100] | Schoenberg<br>et al., 2014<br>[92] | Sidhu,<br>2015 [83] | Siebelink<br>et al.,<br>2021 [102] |
|------------------------------------------------------------------------------------------------------------------------------------------------------------------|----------------------|--------------------------|-------------------------|-------------------------------|----------------------------------|-----------------------------------|------------------------------------|---------------------|------------------------------------|
| Was the study described as randomized, randomized trial, a randomized clinical trial, or an RCT?                                                                 | N                    | Y                        | Y                       | Y                             | Y                                | Y                                 | Y                                  | N                   | Y                                  |
| Was the method of randomization adequate?                                                                                                                        | NR                   | Y                        | Y                       | Y                             | Y                                | Y                                 | NR                                 | NR                  | Y                                  |
| Was the treatment allocation concealed?                                                                                                                          | NR                   | Y                        | Y                       | N                             | NR                               | NR                                | NR                                 | NR                  | Y                                  |
| Were study participants and providers blinded to treatment group assignment?                                                                                     | N                    | N                        | N                       | N                             | N                                | N                                 | N                                  | N                   | N                                  |
| Were the people assessing the outcomes blinded to the participants' group assignments?                                                                           | NR                   | N                        | Y**                     | N                             | N                                | NR                                | NR                                 | NR                  | Y**                                |
| Were the groups similar at baseline on important characteristics that could affect outcomes?                                                                     | Y                    | Y                        | Y                       | Y                             | Y                                | Y                                 | Y                                  | Y                   | Y                                  |
| Was the overall drop-out rate from the study at endpoint 20% or lower of the number allocated to treatment?                                                      | Y                    | Y                        | Y                       | N                             | Y                                | Y                                 | Y                                  | N                   | Y                                  |
| Was the differential drop-out rate at endpoint ≤15% points?                                                                                                      | Y                    | Y                        | Y                       | Y                             | Y                                | Y                                 | Y                                  | Y                   | Y                                  |
| Was there high adherence to the intervention protocols for each treatment group?                                                                                 | NR                   | Y                        | Y                       | Y                             | Y                                | Y                                 | NR                                 | Y                   | Y                                  |
| Were other interventions avoided or similar in the groups? <sup>a</sup>                                                                                          | NR, NR               | N, Y                     | NR, NR                  | Y, Y                          | Y, NR                            | Y, Y                              | NR, Y                              | Y, NR               | Y, Y                               |
| Were outcomes assessed using valid and reliable measures, implement-ted consistently across all study participants?                                              | Y                    | Y                        | Y                       | Y                             | Y                                | Y                                 | Y                                  | N                   | Y                                  |
| Did the authors report that the sample size was sufficiently large to be able to detect a difference in the main outcome between groups with at least 80% power? | N                    | N                        | N                       | Y                             | N                                | N                                 | NR                                 | N                   | Y                                  |
| Were outcomes reported or subgroups analysed pre-specified?                                                                                                      | Y                    | Y                        | Y                       | Y                             | Y                                | Y                                 | Y                                  | Y                   | Y                                  |
| Were all randomized participants analysed in the group to which they were originally assigned, i.e., did they use an intention-to-treat analysis?                | NR                   | Y                        | Y                       | N                             | N                                | Y                                 | N                                  | N                   | Y                                  |
| Evaluation                                                                                                                                                       | G = Good             | F = Fair                 | P = Poor                | P                             | G                                | G                                 | P                                  | P                   | G                                  |

Non-Randomized Controlled Trial Controlled Intervention Studies evaluated with the NHLBI Study Quality Assessment Tool (Y = Yes, N = No, NR = Not reported, NA = Not applicable). In all cases where NR it was not possible to determine from the reported information. <sup>a</sup> Data is separated out for medication and non-medication treatments with medication details given first. \* indicates that study was a feasibility trial for an RCT rather than full RCT. \*\*indicates some self-report measures were also included which were not blind.
