# Supplementary material for: Mindfulness Interventions for Attention Deficit Hyperactivity Disorder: A Systematic Review and Meta-Analysis
Source: MDPI journal article supplement (doi:10.3390/psychiatryint3040031), 2022-12-07
Supplement: s1 [file s1 › psychiatryint-1959904-Supplementary Table S4.pdf]

Table S4. An overview of the study characteristics of poor-quality studies removed from further analysis.

| Study                      | Design | Sample                       | Mindfulness condition                                 | Control condition                                             | ADHD status                | Medication Permitted (Y/N/NR) | Other therapy permitted (Y/N/NR) | Excluded comorbidities                      | Age range of ADHD patients (years) | Gender (M:F) | Analysed sample size (initial sample)              |
|----------------------------|--------|------------------------------|-------------------------------------------------------|---------------------------------------------------------------|----------------------------|-------------------------------|----------------------------------|---------------------------------------------|------------------------------------|--------------|----------------------------------------------------|
| Converse et al. 2020 [1]   | nRCT   | Adult patients               | Tai Chi                                               | Active control (Box Blast)<br>Inactive control (no contact)   | US ADHD diagnosis          | Y                             | NR                               | None                                        | 18-23                              | 7:12         | 19 (21)                                            |
| Gershly et al. 2017 [2]    | RCT    | Families with child patients | Nonviolent resistance and mindfulness parent training | Nonviolent resistance parent training                         | Child – US ADHD diagnosis  | NR                            | NR                               | ID, PSY                                     | 6-15                               | 65:14        | 38 children (79 children: 79 mothers & 73 fathers) |
| Kratter 1983 [3]           | RCT    | Child patients               | Meditation training                                   | Active Control (Relaxation training)<br>Inactive control (WL) | DSM-III                    | Y (Stimulants only)           | NR                               | NEURO, PSY                                  | 7-12                               | 24:0         | 24                                                 |
| Schoenberg et al. 2014 [4] | RCT    | Adult patients               | MBCT                                                  | WL                                                            | DSM-IV-TR                  | Y                             | No extra mindful. therapy        | SUD, PSY<br>PERS, BEH, LD                   | 18-65                              | Not stated   | 50 (61)                                            |
| Sibalis et al. 2019 [5]    | P-P    | Child patients               | Mindfulness Martial Arts                              | WL                                                            | DSM-IV + LD                | Y                             | NR                               | Not stated                                  | 11-17                              | 48:8         | 56                                                 |
| Sidhu 2015 [6]             | RCT    | Child patients               | Mindfulness training                                  | Puzzle or lego                                                | DSM-IV-TR or probable ADHD | Y                             | NR                               | PSY, BPD, SUI, SH, ID, SUD, physical limits | 7-12                               | 13:16        | 29 (34)                                            |
| Zylowska et al. 2008 [7]   | P-P    | Adult + child patients       | Mindfulness training                                  | N/A                                                           | DSM-IV                     | Y                             | Y                                | PSY, BPD, PERS, CD, SUI, SH.                | 15 +                               | 12:20        | 25 (32)                                            |

RCT = Randomized Control Trial, nRCT = Non-Randomised Controlled Trial, Pre-Post = Pre-post design; WL = Waitlist, US = unspecified, Y = Yes, N= No, NR – Not reported ODD = Oppositional Defiant Disorder, SZ = Schizophrenia, BPD = Bipolar Disorder, Substance abuse or dependence = SUD, Autism = ASD, DEP = depression, ANX = anxiety, GAD = Generalised Anxiety Disorder, PD = Panic Disorder, LD = Learning disability, SUI = suicidality, SH = self-harm, NEURO = Neurological condition, DD = Developmental disorder, PSY = Psychosis, MOOD = Any major mood disorder, OCD = Obsessive Compulsivity Disorder, TS = Tourette’s syndrome, PTSD = Post traumatic stress disorder, PERS = personality disorders, ID = Intellectual disability, BEH = behavioural problems (unspecified), CD = Conduct Disorder, M= Male, F = Female.

1. Converse, A.K.; Barrett, B.P.; Chewning, B.A.; Wayne, P.M. Tai Chi training for attention deficit hyperactivity disorder: A feasibility trial in college students. *Complement. Ther. Med.* **2020**, *53*, 102538, doi:10.1016/j.ctim.2020.102538.
2. Gershly, N.; Meehan, K.B.; Omer, H.; Papouchis, N.; Sapir, I.S. Randomized Clinical Trial of Mindfulness Skills Augmentation in Parent Training. *Child & Youth Care Forum* **2017**, *46*, 783-803, doi:10.1007/s10566-017-9411-4.
3. Kratter, J. The use of meditation in the treatment of attention deficit disorder with hyperactivity. St. John's University (New York), 1983.
4. Schoenberg, P.L.; Hepark, S.; Kan, C.C.; Barendregt, H.P.; Buitelaar, J.K.; Speckens, A.E. Effects of mindfulness-based cognitive therapy on neurophysiological correlates of performance monitoring in adult attention-deficit/hyperactivity disorder. *Clin. Neurophys.* **2014**, *125*, 1407-1416, doi:<https://dx.doi.org/10.1016/j.clinph.2013.11.031>.
5. Sibalis, A.; Milligan, K.; Pun, C.; McKeough, T.; Schmidt, L.A.; Segalowitz, S.J. An EEG investigation of the attention-related impact of mindfulness training in youth with ADHD: Outcomes and methodological considerations. *J. Atten. Disord.* **2019**, *23*, 733-743.
6. Sidhu, P. The efficacy of mindfulness meditation in increasing the attention span in children with ADHD. Dissertation, 2015.
7. Zylowska, L.; Ackerman, D.L.; Yang, M.H.; Futrell, J.L.; Horton, N.L.; Hale, T.S.; Pataki, C.; Smalley, S.L. Mindfulness meditation training in adults and adolescents with ADHD: A feasibility study. *J. Atten. Disord.* **2008**, *11*, 737-746.
