# Supplementary material for: Mindfulness Interventions for Attention Deficit Hyperactivity Disorder: A Systematic Review and Meta-Analysis
Source: MDPI journal article supplement (doi:10.3390/psychiatryint3040031), 2022-12-07
Supplement: s1 [file s1 › psychiatryint-1959904-Suppplementary Table S5.pdf]

**Supplementary Table S5.** An overview of the most consistently applied measures, not otherwise separately tabulated. Effect sizes (g) refer to those immediately after any intervention.

| <b>ADHD Symptoms</b>                  | <b>Mindfulness Effect Size Range</b> | <b>Control Effect Size Range</b> |
|---------------------------------------|--------------------------------------|----------------------------------|
| <b>CAARS-INV (Adults)</b>             |                                      |                                  |
| Total score [1-4]                     | -0.37, -0.94                         | -0.14, -0.89                     |
| <b>CAARS-SR (Adults)</b>              |                                      |                                  |
| ADHD Index [1,3,5]                    | -0.17, -1.68                         | -0.23, -0.50                     |
| Total score [1-4]                     | -0.72, 0.30                          | -0.19, -0.60                     |
| <b>BRIEF-ASR (Adults)</b>             |                                      |                                  |
| Total [2,4,6]                         | -0.26, -1.13                         | -0.07, 0.20                      |
| <b>ANT (Adults)</b>                   |                                      |                                  |
| Alerting [5-7]                        | -1.11, 0.29                          | -0.08, 0.30                      |
| Orienting [5-7]                       | -0.84, 0.08                          | -0.06, -0.16                     |
| Conflict [5-7]                        | -0.11, -0.58                         | -0.10, -0.63                     |
| <b>Quality of Life (Adults)</b>       |                                      |                                  |
| Outcomes Questionnaire [2,4]          | -0.15, -0.32                         | -0.09, -0.12                     |
| <b>Depression (Adults)</b>            |                                      |                                  |
| BDI [2,3,5,7]                         | -0.34, -0.71                         | -0.04, -0.44                     |
| <b>Anxiety (Adults)</b>               |                                      |                                  |
| STAI [2,5,7]                          | -0.52, -0.70                         | -0.06, -0.28                     |
| <b>Stress (Parents)</b>               |                                      |                                  |
| PSI Total [8-11]                      | -1.22, 0.16                          | -0.29, 0.04                      |
| <b>Behaviour inventory (Children)</b> |                                      |                                  |
| CBCL Total [10,12]                    | -0.37, -1.72                         | -0.04, 0.00                      |
| <b>Mindfulness (Adults)</b>           |                                      |                                  |
| MAAS total [5,13]                     | 0.57, 1.16                           | 0.09, 0.30                       |

1. Bachmann, K.; Lam, A.P.; Soros, P.; Kanat, M.; Hoxhaj, E.; Matthies, S.; Feige, B.; Muller, H.; Ozyurt, J.; Thiel, C.M.; et al. Effects of mindfulness and psychoeducation on working memory in adult ADHD: A randomised, controlled fMRI study. *Behav. Res. Ther.* **2018**, *106*, 47-56, doi:10.1016/j.brat.2018.05.002.
2. Hepark, S.; Janssen, L.; de Vries, A.; Schoenberg, P.L.; Donders, R.; Kan, C.C.; Speckens, A.E. The efficacy of adapted MBCT on core symptoms and executive functioning in adults with ADHD: A preliminary randomized controlled trial. *J. Atten. Disord.* **2019**, *23*, 351-362.
3. Hoxhaj, E.; Sadohara, C.; Borel, P.; D'Amelio, R.; Sobanski, E.; Müller, H.; Feige, B.; Matthies, S.; Philipsen, A. Mindfulness vs psychoeducation in adult ADHD: a randomized controlled trial. *Eur. Arch. Psychiatry Clin. Neurosci.* **2018**, *268*, 321-335, doi:10.1007/s00406-018-0868-4.
4. Janssen, L.; Kan, C.C.; Carpentier, P.J.; Sizoo, B.; Hepark, S.; Schellekens, M.P.J.; Donders, A.R.T.; Buitelaar, J.K.; Speckens, A.E.M. Mindfulness-based cognitive therapy v. treatment as usual in adults with ADHD: a multicentre, single-blind, randomised controlled trial. *Psychol. Med.* **2019**, *49*, 55-65, doi:10.1017/S0033291718000429.
5. Gu, Y.Q.; Xu, G.X.; Zhu, Y. A Randomized Controlled Trial of Mindfulness-Based Cognitive Therapy for College Students With ADHD. *J. Atten. Disord.* **2018**, *22*, 388-399, doi:10.1177/1087054716686183.
6. Mitchell, J.T.; McIntyre, E.M.; English, J.S.; Dennis, M.F.; Beckham, J.C.; Kollins, S.H. A pilot trial of mindfulness meditation training for ADHD in adulthood: impact on core symptoms, executive functioning, and emotion dysregulation. *J. Atten. Disord.* **2017**, *21*, 1105-1120.
7. Bueno, V.F.; Kozasa, E.H.; da Silva, M.A.; Alves, T.M.; Louzã, M.R.; Pompéia, S. Mindfulness meditation improves mood, quality of life, and attention in adults with attention deficit hyperactivity disorder. *Biomed. Res. Int.* **2015**, *2015*.
8. Behbahani, M.; Zargar, F.; Assarian, F.; Akbari, H. Effects of mindful parenting training on clinical symptoms in children with attention deficit hyperactivity disorder and parenting stress: Randomized controlled trial. *Iran. J. Med. Sci.* **2018**, *43*, 596.
9. Liu, P.; Qiu, S.W.; Lo, H.H.M.; Song, X.L.; Qian, Q.J. Applying the Mindful Parenting Program Among Chinese Parents of Children with ADHD: A Randomized Control Trial. *Mindfulness* **2021**, *12*, 1473-1489, doi:10.1007/s12671-021-01616-6.
10. Lo, H.H.; Wong, S.W.; Wong, J.Y.; Yeung, J.W.; Snel, E.; Wong, S.Y. The effects of family-based mindfulness intervention on ADHD symptomatology in young children and their parents: A randomized control trial. *J. Atten. Disord.* **2020**, *24*, 667-680, doi:<https://dx.doi.org/10.1177/1087054717743330>.
11. Zhang, J.; Díaz-Román, A.; Cortese, S. Meditation-based therapies for attention-deficit/hyperactivity disorder in children, adolescents and adults: a systematic review and meta-analysis. *Evid. Based Ment. Health* **2018**, *21*, 87-94.
12. Rynczak, D. Effectiveness of mindfulness in reducing impulsivity in youth with attention-deficit/hyperactivity disorder. Dissertation, 2013.
13. Edel, M.-A.; Hölter, T.; Wassink, K.; Juckel, G. A comparison of mindfulness-based group training and skills group training in adults with ADHD: An open study. *J. Atten. Disord.* **2017**, *21*, 533-539.
