# Supplementary figures and images for: Mindfulness Interventions for Attention Deficit Hyperactivity Disorder: A Systematic Review and Meta-Analysis
Source: MDPI journal article supplement (doi:10.3390/psychiatryint3040031), 2022-12-07

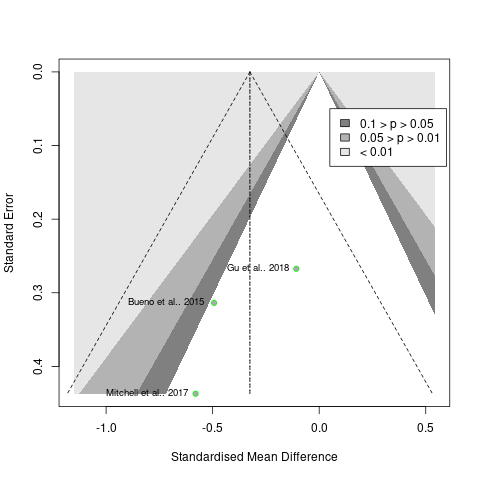

Supplement: s1 [file s1 › psychiatryint-1959904-Supplementary Figure S1.tif]

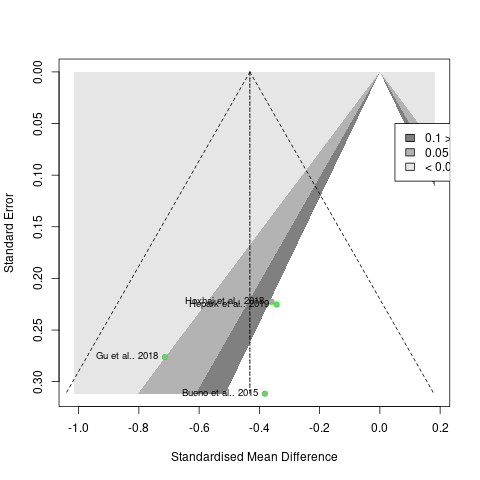

Supplement: s1 [file s1 › psychiatryint-1959904-Supplementary Figure S2.tif]
